# Supplementary material
Source: publisher figshare collection journal article supplement (https://acs.figshare.com/ndownloader/files/4836490)
Supplement: Supplementary file 1 [file 4836490]

#######################################################################
# This file contains crystal structure data downloaded from the
# Cambridge Structural Database (CSD) hosted by the Cambridge
# Crystallographic Data Centre (CCDC).
# Full information about CCDC data access policies and citation
# guidelines are available at http://www.ccdc.cam.ac.uk/access/V1
# Audit and citation data items may have been added by the CCDC.
# Please retain this information to preserve the provenance of
# this file and to allow appropriate attribution of the data.
#######################################################################
data_allenabs
_audit_creation_method            SHELXL-97
_chemical_name_common             ?
_chemical_name_systematic
;
 ?
;
_chemical_formula_moiety          'C15 H19 Br2 Cl O3'
_chemical_formula_sum             'C15 H19 Br2 Cl O3'
_chemical_formula_weight          442.57
_chemical_melting_point           ?
loop_
  _atom_type_symbol
  _atom_type_description
  _atom_type_scat_dispersion_real
  _atom_type_scat_dispersion_imag
  _atom_type_scat_source
 C C 0.0181 0.0091 'International Tables Vol C Tables 4.2.6.8 and 6.1.1.4'
 H H 0.0000 0.0000 'International Tables Vol C Tables 4.2.6.8 and 6.1.1.4'
 O O 0.0492 0.0322 'International Tables Vol C Tables 4.2.6.8 and 6.1.1.4'
 Cl Cl 0.3639 0.7018 'International Tables Vol C Tables 4.2.6.8 and 6.1.1.4'
 Br Br -0.6763 1.2805 'International Tables Vol C Tables 4.2.6.8 and 6.1.1.4'

loop_
  _space_group_symop_id
  _space_group_symop_operation_xyz
 1 'x, y, z'
 2 '-x, y+1/2, -z'

_symmetry_cell_setting            monoclinic
_symmetry_space_group_name_H-M    P21
_symmetry_space_group_name_Hall   ' P 2yb'
_cell_length_a                    15.775(5)
_cell_length_b                    7.137(3)
_cell_length_c                    16.382(5)
_cell_angle_alpha                 90.00
_cell_angle_beta                  107.97(3)
_cell_angle_gamma                 90.00
_cell_volume                      1754.4(11)
_cell_formula_units_Z             4
_cell_measurement_reflns_used     1720
_cell_measurement_temperature     293(2)
_cell_measurement_theta_max       60.69
_cell_measurement_theta_min       3.38
_exptl_absorpt_coefficient_mu     7.32
_exptl_absorpt_correction_T_max   .625
_exptl_absorpt_correction_T_min   .438
_exptl_absorpt_correction_type    multi-scan
_exptl_absorpt_process_details
;
CrysAlisPro, Agilent Technologies,
Version 1.171.36.21 (release 14-08-2012 CrysAlis171 .NET)
(compiled Sep 14 2012,17:21:16)
Empirical absorption correction using spherical harmonics,
 implemented in SCALE3 ABSPACK scaling algorithm.
;
_exptl_crystal_colour             colourlees
_exptl_crystal_density_diffrn     1.672
_exptl_crystal_density_meas       ?
_exptl_crystal_density_method     'not measured'
_exptl_crystal_description        needle
_exptl_crystal_F_000              880
_exptl_crystal_size_max           .20
_exptl_crystal_size_mid           .18
_exptl_crystal_size_min           .15
_exptl_special_details
;
 ?
;
_diffrn_reflns_av_R_equivalents   0.0475
_diffrn_reflns_av_sigmaI/netI     0.0604
_diffrn_reflns_limit_h_max        10
_diffrn_reflns_limit_h_min        -17
_diffrn_reflns_limit_k_max        7
_diffrn_reflns_limit_k_min        -7
_diffrn_reflns_limit_l_max        13
_diffrn_reflns_limit_l_min        -16
_diffrn_reflns_number             6132
_diffrn_reflns_theta_full         65.60
_diffrn_reflns_theta_max          60.00
_diffrn_reflns_theta_min          3.40
_diffrn_ambient_temperature       293(2)
_diffrn_detector_area_resol_mean  10.5953
_diffrn_measured_fraction_theta_full 0.976
_diffrn_measured_fraction_theta_max 0.976
_diffrn_measurement_device_type   'SuperNova, Dual, Cu at zero, Atlas'
_diffrn_measurement_method        '\w scan'
_diffrn_radiation_monochromator   mirror
_diffrn_radiation_source          'SuperNova (Cu) X-ray Source'
_diffrn_radiation_type            'Cu K\a'
_diffrn_radiation_wavelength      1.5418
_reflns_number_gt                 2329
_reflns_number_total              3600
_reflns_threshold_expression      >2sigma(I)
_computing_cell_refinement
;
CrysAlisPro, Agilent Technologies,
Version 1.171.36.21 (release 14-08-2012 CrysAlis171 .NET)
(compiled Sep 14 2012,17:21:16)
;
_computing_data_collection
;
CrysAlisPro, Agilent Technologies,
Version 1.171.36.21 (release 14-08-2012 CrysAlis171 .NET)
(compiled Sep 14 2012,17:21:16)
;
_computing_data_reduction
;
CrysAlisPro, Agilent Technologies,
Version 1.171.36.21 (release 14-08-2012 CrysAlis171 .NET)
(compiled Sep 14 2012,17:21:16)
;
_computing_molecular_graphics
'PLATON (Spek, 2009) & MERCURY (Macrae <i>et al.</i>, 2006)'
_computing_publication_material   'WINGX ( Farrugia, 1999 )'
_computing_structure_refinement   'SHELXL-97 (Sheldrick, 2008)'
_computing_structure_solution     'SIR2004 (Burla et al., 2005)'
_refine_diff_density_max          0.364
_refine_diff_density_min          -0.595
_refine_diff_density_rms          0.077
_refine_ls_abs_structure_details  'Flack H D (1983), Acta Cryst. A39, 876-881'
_refine_ls_abs_structure_Flack    -0.04(6)
_refine_ls_extinction_coef        0.0011(3)
_refine_ls_extinction_expression  Fc^*^=kFc[1+0.001xFc^2^\l^3^/sin(2\q)]^-1/4^
_refine_ls_extinction_method      SHELXL
_refine_ls_goodness_of_fit_ref    0.995
_refine_ls_hydrogen_treatment     costr
_refine_ls_matrix_type            full
_refine_ls_number_parameters      382
_refine_ls_number_reflns          3600
_refine_ls_number_restraints      1
_refine_ls_R_factor_all           0.0846
_refine_ls_R_factor_gt            0.0647
_refine_ls_restrained_S_all       0.995
_refine_ls_shift/su_max           0.000
_refine_ls_shift/su_mean          0.000
_refine_ls_structure_factor_coef  Fsqd
_refine_ls_weighting_details
'calc w=1/[\s^2^(Fo^2^)+(0.1187P)^2^+0.0000P] where P=(Fo^2^+2Fc^2^)/3'
_refine_ls_weighting_scheme       calc
_refine_ls_wR_factor_gt           0.1704
_refine_ls_wR_factor_ref          0.2058
_refine_special_details
;
 Refinement of F^2^ against ALL reflections.  The weighted R-factor wR and
 goodness of fit S are based on F^2^, conventional R-factors R are based
 on F, with F set to zero for negative F^2^. The threshold expression of
 F^2^ > 2sigma(F^2^) is used only for calculating R-factors(gt) etc. and is
 not relevant to the choice of reflections for refinement.  R-factors based
 on F^2^ are statistically about twice as large as those based on F, and R-
 factors based on ALL data will be even larger.
;
_atom_sites_solution_hydrogens    geom
_atom_sites_solution_primary      direct
_atom_sites_solution_secondary    difmap
loop_
  _atom_site_label
  _atom_site_type_symbol
  _atom_site_fract_x
  _atom_site_fract_y
  _atom_site_fract_z
  _atom_site_U_iso_or_equiv
  _atom_site_adp_type
  _atom_site_occupancy
  _atom_site_symmetry_multiplicity
  _atom_site_calc_flag
  _atom_site_refinement_flags
  _atom_site_disorder_assembly
  _atom_site_disorder_group
 Br1 Br 0.63875(15) -0.4667(3) 0.50393(14) 0.1456(8) Uani 1 1 d . . .
 Br2 Br 0.37534(15) 0.2074(2) 0.06166(12) 0.1407(8) Uani 1 1 d . . .
 Cl1 Cl 0.6739(3) -0.2600(7) 0.1926(3) 0.1409(15) Uani 1 1 d . . .
 O1 O 0.4244(7) -0.6165(13) 0.2991(7) 0.114(3) Uani 1 1 d . . .
 O2 O 0.4980(7) -0.1942(12) 0.2399(6) 0.106(3) Uani 1 1 d . . .
 O3 O 0.2291(8) -0.3102(19) 0.2049(8) 0.146(4) Uani 1 1 d . . .
 C1 C 0.5046(12) -0.518(2) 0.3426(11) 0.122(5) Uani 1 1 d . . .
 H1 H 0.4887 -0.3944 0.3593 0.146 Uiso 1 1 calc R . .
 C2 C 0.5599(11) -0.493(2) 0.2846(11) 0.120(5) Uani 1 1 d . . .
 H2A H 0.6163 -0.4359 0.3165 0.144 Uiso 1 1 calc R . .
 H2B H 0.5725 -0.6142 0.2645 0.144 Uiso 1 1 calc R . .
 C3 C 0.5151(10) -0.373(2) 0.2093(10) 0.103(4) Uani 1 1 d . . .
 H3 H 0.4573 -0.4300 0.1801 0.124 Uiso 1 1 calc R . .
 C4 C 0.5571(9) -0.322(2) 0.1418(9) 0.111(4) Uani 1 1 d . . .
 H4 H 0.5520 -0.4256 0.1014 0.133 Uiso 1 1 calc R . .
 C5 C 0.5040(11) -0.157(2) 0.0977(10) 0.118(5) Uani 1 1 d . . .
 H5A H 0.4497 -0.1966 0.0544 0.142 Uiso 1 1 calc R . .
 H5B H 0.5383 -0.0784 0.0714 0.142 Uiso 1 1 calc R . .
 C6 C 0.4834(11) -0.0555(18) 0.1726(10) 0.111(5) Uani 1 1 d . . .
 H6 H 0.5292 0.0411 0.1932 0.133 Uiso 1 1 calc R . .
 C7 C 0.3938(11) 0.039(2) 0.1587(10) 0.118(5) Uani 1 1 d . . .
 H7 H 0.3964 0.1134 0.2098 0.142 Uiso 1 1 calc R . .
 C8 C 0.3152(10) -0.103(2) 0.1422(10) 0.117(5) Uani 1 1 d . . .
 H8A H 0.2597 -0.0347 0.1192 0.140 Uiso 1 1 calc R . .
 H8B H 0.3196 -0.1911 0.0987 0.140 Uiso 1 1 calc R . .
 C9 C 0.3115(10) -0.207(2) 0.2167(14) 0.126(6) Uani 1 1 d . . .
 H9 H 0.3384 -0.1477 0.2727 0.151 Uiso 1 1 calc R . .
 C10 C 0.3069(12) -0.411(2) 0.2147(12) 0.117(5) Uani 1 1 d . . .
 H10 H 0.3120 -0.4697 0.1623 0.140 Uiso 1 1 calc R . .
 C11 C 0.3398(11) -0.533(3) 0.2973(11) 0.123(5) Uani 1 1 d . . .
 H11 H 0.2977 -0.6377 0.2882 0.147 Uiso 1 1 calc R . .
 C12 C 0.5486(12) -0.629(2) 0.4227(11) 0.131(5) Uani 1 1 d . . .
 H12 H 0.5028 -0.6603 0.4496 0.157 Uiso 1 1 calc R . .
 C13 C 0.5883(15) -0.804(3) 0.4068(14) 0.153(7) Uani 1 1 d . . .
 C14 C 0.6238(17) -0.935(3) 0.3941(14) 0.165(8) Uani 1 1 d . . .
 H14 H 0.6527 -1.0417 0.3838 0.198 Uiso 1 1 calc R . .
 C15 C 0.3369(12) -0.441(3) 0.3781(11) 0.140(6) Uani 1 1 d . . .
 H15A H 0.3517 -0.5310 0.4239 0.210 Uiso 1 1 calc R . .
 H15B H 0.2781 -0.3931 0.3704 0.210 Uiso 1 1 calc R . .
 H15C H 0.3790 -0.3400 0.3920 0.210 Uiso 1 1 calc R . .
 Br1' Br 0.85671(16) -0.6441(3) 0.45202(16) 0.1540(9) Uani 1 1 d . . .
 Br2' Br 0.93396(18) -1.3161(3) 0.04912(16) 0.1604(9) Uani 1 1 d . . .
 Cl1' Cl 0.6935(3) -0.7834(7) 0.1071(3) 0.1490(16) Uani 1 1 d . . .
 O1' O 1.0128(7) -0.5042(13) 0.2997(8) 0.126(3) Uani 1 1 d . . .
 O2' O 0.8903(7) -0.9119(13) 0.2097(8) 0.119(3) Uani 1 1 d . . .
 O3' O 1.1663(8) -0.8425(19) 0.2468(11) 0.170(5) Uani 1 1 d . . .
 C1' C 0.9459(12) -0.600(2) 0.3267(10) 0.110(4) Uani 1 1 d . . .
 H1' H 0.9652 -0.7288 0.3424 0.132 Uiso 1 1 calc R . .
 C2' C 0.8599(11) -0.602(2) 0.2470(10) 0.109(4) Uani 1 1 d . . .
 H2'1 H 0.8101 -0.6505 0.2636 0.131 Uiso 1 1 calc R . .
 H2'2 H 0.8455 -0.4759 0.2255 0.131 Uiso 1 1 calc R . .
 C3' C 0.8747(10) -0.7193(19) 0.1807(10) 0.106(4) Uani 1 1 d . . .
 H3' H 0.9285 -0.6740 0.1691 0.127 Uiso 1 1 calc R . .
 C4' C 0.8013(12) -0.744(2) 0.0940(13) 0.124(5) Uani 1 1 d . . .
 H4' H 0.7996 -0.6351 0.0569 0.149 Uiso 1 1 calc R . .
 C5' C 0.8317(13) -0.919(3) 0.0571(11) 0.143(6) Uani 1 1 d . . .
 H5'1 H 0.8758 -0.8889 0.0290 0.172 Uiso 1 1 calc R . .
 H5'2 H 0.7817 -0.9823 0.0166 0.172 Uiso 1 1 calc R . .
 C6' C 0.8723(13) -1.039(2) 0.1386(11) 0.118(5) Uani 1 1 d . . .
 H6' H 0.8277 -1.1303 0.1435 0.142 Uiso 1 1 calc R . .
 C7' C 0.9600(12) -1.141(2) 0.1497(12) 0.131(5) Uani 1 1 d . . .
 H7' H 0.9732 -1.2172 0.2020 0.157 Uiso 1 1 calc R . .
 C8' C 1.0413(12) -1.026(2) 0.1543(14) 0.140(6) Uani 1 1 d . . .
 H8'1 H 1.0865 -1.1086 0.1457 0.169 Uiso 1 1 calc R . .
 H8'2 H 1.0255 -0.9374 0.1070 0.169 Uiso 1 1 calc R . .
 C9' C 1.0806(12) -0.921(3) 0.2337(15) 0.135(6) Uani 1 1 d . . .
 H9' H 1.0730 -0.9808 0.2848 0.162 Uiso 1 1 calc R . .
 C10' C 1.0909(11) -0.715(2) 0.2408(16) 0.137(7) Uani 1 1 d . . .
 H10' H 1.0690 -0.6493 0.1856 0.164 Uiso 1 1 calc R . .
 C11' C 1.0988(12) -0.596(3) 0.3148(14) 0.137(6) Uani 1 1 d . . .
 H11' H 1.1412 -0.4965 0.3130 0.164 Uiso 1 1 calc R . .
 C12' C 0.9342(12) -0.502(3) 0.4035(12) 0.127(5) Uani 1 1 d . . .
 H12' H 0.9927 -0.4913 0.4470 0.153 Uiso 1 1 calc R . .
 C13' C 0.8983(13) -0.312(3) 0.3822(12) 0.129(5) Uani 1 1 d . . .
 C14' C 0.8749(16) -0.163(3) 0.3662(15) 0.168(8) Uani 1 1 d . . .
 H14' H 0.8557 -0.0399 0.3532 0.201 Uiso 1 1 calc R . .
 C15' C 1.1338(13) -0.685(4) 0.3993(13) 0.158(7) Uani 1 1 d . . .
 H15D H 1.0948 -0.7855 0.4038 0.237 Uiso 1 1 calc R . .
 H15E H 1.1373 -0.5947 0.4435 0.237 Uiso 1 1 calc R . .
 H15F H 1.1921 -0.7348 0.4059 0.237 Uiso 1 1 calc R . .

loop_
  _atom_site_aniso_label
  _atom_site_aniso_U_11
  _atom_site_aniso_U_22
  _atom_site_aniso_U_33
  _atom_site_aniso_U_23
  _atom_site_aniso_U_13
  _atom_site_aniso_U_12
 Br1 0.1661(15) 0.1270(13) 0.1340(16) -0.0173(12) 0.0318(12) -0.0165(12)
 Br2 0.1855(17) 0.1182(12) 0.1226(14) 0.0120(11) 0.0537(12) 0.0279(12)
 Cl1 0.131(3) 0.137(3) 0.163(4) 0.021(3) 0.059(3) 0.001(2)
 O1 0.148(8) 0.093(5) 0.107(8) -0.013(5) 0.048(7) -0.011(5)
 O2 0.134(7) 0.085(5) 0.106(7) -0.002(5) 0.050(6) 0.002(4)
 O3 0.136(8) 0.135(8) 0.175(11) -0.029(9) 0.062(8) 0.008(7)
 C1 0.162(14) 0.108(10) 0.116(13) -0.023(9) 0.070(12) -0.031(9)
 C2 0.138(11) 0.092(8) 0.129(13) 0.015(9) 0.038(11) 0.012(8)
 C3 0.112(9) 0.130(11) 0.083(11) -0.011(8) 0.051(9) -0.018(8)
 C4 0.117(9) 0.116(10) 0.092(11) -0.009(8) 0.023(9) 0.001(8)
 C5 0.151(12) 0.103(9) 0.108(12) 0.006(9) 0.052(10) 0.013(9)
 C6 0.149(12) 0.079(7) 0.101(11) 0.008(8) 0.035(10) 0.002(7)
 C7 0.154(12) 0.111(10) 0.104(11) -0.010(9) 0.061(10) 0.023(10)
 C8 0.124(10) 0.120(11) 0.102(12) -0.007(9) 0.029(10) 0.025(9)
 C9 0.112(10) 0.100(10) 0.159(17) -0.005(10) 0.035(11) -0.018(7)
 C10 0.151(13) 0.119(11) 0.101(13) -0.011(9) 0.071(11) 0.004(9)
 C11 0.121(12) 0.147(14) 0.109(14) -0.035(11) 0.048(10) -0.022(9)
 C12 0.148(12) 0.117(11) 0.109(13) 0.033(10) 0.014(10) -0.013(10)
 C13 0.199(18) 0.107(12) 0.141(16) 0.047(12) 0.035(13) 0.017(13)
 C14 0.21(2) 0.117(15) 0.136(17) 0.027(13) 0.005(14) 0.003(14)
 C15 0.157(14) 0.169(16) 0.104(13) -0.008(12) 0.055(11) -0.046(13)
 Br1' 0.200(2) 0.1227(13) 0.165(2) 0.0026(12) 0.0944(18) -0.0025(13)
 Br2' 0.219(2) 0.1291(13) 0.161(2) -0.0166(14) 0.0989(18) -0.0119(16)
 Cl1' 0.138(3) 0.126(3) 0.177(4) 0.010(3) 0.039(3) -0.004(3)
 O1' 0.136(7) 0.103(6) 0.153(10) 0.021(6) 0.066(7) 0.012(6)
 O2' 0.125(7) 0.107(7) 0.130(9) 0.030(6) 0.046(7) 0.006(5)
 O3' 0.124(8) 0.139(9) 0.257(17) 0.010(10) 0.072(10) 0.007(7)
 C1' 0.149(12) 0.096(8) 0.094(12) 0.006(8) 0.051(10) 0.021(8)
 C2' 0.132(11) 0.106(9) 0.084(10) 0.007(8) 0.025(9) -0.002(8)
 C3' 0.118(10) 0.104(9) 0.095(11) 0.012(8) 0.031(9) -0.016(7)
 C4' 0.150(13) 0.094(9) 0.144(15) 0.012(9) 0.069(12) -0.008(8)
 C5' 0.152(14) 0.158(17) 0.105(13) 0.020(12) 0.018(11) -0.005(11)
 C6' 0.161(14) 0.099(9) 0.108(13) -0.018(9) 0.061(11) -0.003(8)
 C7' 0.168(15) 0.108(10) 0.140(15) -0.002(10) 0.083(13) 0.009(10)
 C8' 0.135(12) 0.120(12) 0.18(2) 0.028(12) 0.068(14) -0.002(10)
 C9' 0.135(13) 0.125(13) 0.148(17) -0.005(11) 0.049(12) -0.015(10)
 C10' 0.117(11) 0.102(10) 0.21(2) 0.033(12) 0.074(13) -0.002(8)
 C11' 0.137(13) 0.121(12) 0.152(18) 0.011(13) 0.045(13) 0.004(10)
 C12' 0.135(12) 0.127(12) 0.127(14) -0.002(11) 0.050(11) -0.014(10)
 C13' 0.183(15) 0.088(10) 0.125(13) -0.010(10) 0.062(12) -0.014(11)
 C14' 0.22(2) 0.120(16) 0.18(2) -0.011(15) 0.089(19) 0.008(15)
 C15' 0.139(13) 0.21(2) 0.126(15) 0.020(15) 0.039(12) 0.023(13)

_geom_special_details
;
 All esds (except the esd in the dihedral angle between two l.s. planes)
 are estimated using the full covariance matrix.  The cell esds are taken
 into account individually in the estimation of esds in distances, angles
 and torsion angles; correlations between esds in cell parameters are only
 used when they are defined by crystal symmetry.  An approximate (isotropic)
 treatment of cell esds is used for estimating esds involving l.s. planes.
;
loop_
  _geom_bond_atom_site_label_1
  _geom_bond_atom_site_label_2
  _geom_bond_distance
  _geom_bond_site_symmetry_2
  _geom_bond_publ_flag
 Br1 C12 1.993(17) . ?
 Br2 C7 1.941(16) . ?
 Cl1 C4 1.827(14) . ?
 O1 C1 1.429(18) . ?
 O1 C11 1.455(19) . ?
 O2 C3 1.423(16) . ?
 O2 C6 1.446(17) . ?
 O3 C9 1.456(18) . ?
 O3 C10 1.39(2) . ?
 C1 H1 0.9800 . ?
 C1 C2 1.49(2) . ?
 C1 C12 1.51(2) . ?
 C2 H2A 0.9700 . ?
 C2 H2B 0.9700 . ?
 C2 C3 1.49(2) . ?
 C3 H3 0.9800 . ?
 C3 C4 1.50(2) . ?
 C4 H4 0.9800 . ?
 C4 C5 1.49(2) . ?
 C5 H5A 0.9700 . ?
 C5 H5B 0.9700 . ?
 C5 C6 1.54(2) . ?
 C6 H6 0.9800 . ?
 C6 C7 1.52(2) . ?
 C7 H7 0.9800 . ?
 C7 C8 1.56(2) . ?
 C8 H8A 0.9700 . ?
 C8 H8B 0.9700 . ?
 C8 C9 1.44(2) . ?
 C9 H9 0.9800 . ?
 C9 C10 1.46(2) . ?
 C10 H10 0.9800 . ?
 C10 C11 1.56(2) . ?
 C11 H11 0.9800 . ?
 C11 C15 1.49(2) . ?
 C12 H12 0.9800 . ?
 C12 C13 1.45(3) . ?
 C13 C14 1.14(3) . ?
 C14 H14 0.9300 . ?
 C15 H15A 0.9600 . ?
 C15 H15B 0.9600 . ?
 C15 H15C 0.9600 . ?
 Br1' C12' 1.938(16) . ?
 Br2' C7' 2.005(17) . ?
 Cl1' C4' 1.802(16) . ?
 O1' C1' 1.436(18) . ?
 O1' C11' 1.46(2) . ?
 O2' C3' 1.450(16) . ?
 O2' C6' 1.434(18) . ?
 O3' C9' 1.42(2) . ?
 O3' C10' 1.48(2) . ?
 C1' H1' 0.9800 . ?
 C1' C2' 1.57(2) . ?
 C1' C12' 1.50(2) . ?
 C2' H2'1 0.9700 . ?
 C2' H2'2 0.9700 . ?
 C2' C3' 1.44(2) . ?
 C3' H3' 0.9800 . ?
 C3' C4' 1.54(2) . ?
 C4' H4' 0.9800 . ?
 C4' C5' 1.53(2) . ?
 C5' H5'1 0.9700 . ?
 C5' H5'2 0.9700 . ?
 C5' C6' 1.55(2) . ?
 C6' H6' 0.9800 . ?
 C6' C7' 1.52(2) . ?
 C7' H7' 0.9800 . ?
 C7' C8' 1.51(2) . ?
 C8' H8'1 0.9700 . ?
 C8' H8'2 0.9700 . ?
 C8' C9' 1.46(3) . ?
 C9' H9' 0.9800 . ?
 C9' C10' 1.48(2) . ?
 C10' H10' 0.9800 . ?
 C10' C11' 1.46(3) . ?
 C11' H11' 0.9800 . ?
 C11' C15' 1.47(2) . ?
 C12' H12' 0.9800 . ?
 C12' C13' 1.46(3) . ?
 C13' C14' 1.13(3) . ?
 C14' H14' 0.9300 . ?
 C15' H15D 0.9600 . ?
 C15' H15E 0.9600 . ?
 C15' H15F 0.9600 . ?

loop_
  _geom_angle_atom_site_label_1
  _geom_angle_atom_site_label_2
  _geom_angle_atom_site_label_3
  _geom_angle
  _geom_angle_site_symmetry_1
  _geom_angle_site_symmetry_3
  _geom_angle_publ_flag
 C1 O1 C11 118.3(11) . . ?
 C3 O2 C6 110.3(10) . . ?
 C10 O3 C9 61.7(9) . . ?
 O1 C1 H1 108.6 . . ?
 O1 C1 C2 110.2(13) . . ?
 O1 C1 C12 106.0(13) . . ?
 C2 C1 H1 108.6 . . ?
 C2 C1 C12 114.7(16) . . ?
 C12 C1 H1 108.6 . . ?
 C1 C2 H2A 109.2 . . ?
 C1 C2 H2B 109.2 . . ?
 H2A C2 H2B 107.9 . . ?
 C3 C2 C1 112.2(14) . . ?
 C3 C2 H2A 109.2 . . ?
 C3 C2 H2B 109.2 . . ?
 O2 C3 C2 108.5(12) . . ?
 O2 C3 H3 107.3 . . ?
 O2 C3 C4 102.6(11) . . ?
 C2 C3 H3 107.3 . . ?
 C2 C3 C4 123.1(14) . . ?
 C4 C3 H3 107.3 . . ?
 Cl1 C4 H4 110.6 . . ?
 C3 C4 Cl1 109.6(10) . . ?
 C3 C4 H4 110.6 . . ?
 C5 C4 Cl1 111.6(11) . . ?
 C5 C4 C3 103.7(13) . . ?
 C5 C4 H4 110.6 . . ?
 C4 C5 H5A 111.3 . . ?
 C4 C5 H5B 111.3 . . ?
 C4 C5 C6 102.2(12) . . ?
 H5A C5 H5B 109.2 . . ?
 C6 C5 H5A 111.3 . . ?
 C6 C5 H5B 111.3 . . ?
 O2 C6 C5 105.1(10) . . ?
 O2 C6 H6 107.0 . . ?
 O2 C6 C7 109.9(13) . . ?
 C5 C6 H6 107.0 . . ?
 C7 C6 C5 120.3(14) . . ?
 C7 C6 H6 107.0 . . ?
 Br2 C7 H7 108.7 . . ?
 C6 C7 Br2 107.2(10) . . ?
 C6 C7 H7 108.7 . . ?
 C6 C7 C8 113.0(13) . . ?
 C8 C7 Br2 110.4(11) . . ?
 C8 C7 H7 108.7 . . ?
 C7 C8 H8A 108.5 . . ?
 C7 C8 H8B 108.5 . . ?
 H8A C8 H8B 107.5 . . ?
 C9 C8 C7 115.1(14) . . ?
 C9 C8 H8A 108.5 . . ?
 C9 C8 H8B 108.5 . . ?
 O3 C9 H9 116.9 . . ?
 O3 C9 C10 56.9(10) . . ?
 C8 C9 O3 114.6(16) . . ?
 C8 C9 H9 116.9 . . ?
 C8 C9 C10 120.6(19) . . ?
 C10 C9 H9 116.9 . . ?
 O3 C10 C9 61.4(11) . . ?
 O3 C10 H10 115.3 . . ?
 O3 C10 C11 115.8(14) . . ?
 C9 C10 H10 115.3 . . ?
 C9 C10 C11 122.6(17) . . ?
 C11 C10 H10 115.3 . . ?
 O1 C11 C10 107.6(13) . . ?
 O1 C11 H11 105.4 . . ?
 O1 C11 C15 116.2(15) . . ?
 C10 C11 H11 105.4 . . ?
 C15 C11 C10 115.6(16) . . ?
 C15 C11 H11 105.4 . . ?
 Br1 C12 H12 107.8 . . ?
 C1 C12 Br1 108.5(11) . . ?
 C1 C12 H12 107.8 . . ?
 C13 C12 Br1 111.1(13) . . ?
 C13 C12 C1 113.7(17) . . ?
 C13 C12 H12 107.8 . . ?
 C14 C13 C12 176(3) . . ?
 C13 C14 H14 180.0 . . ?
 C11 C15 H15A 109.5 . . ?
 C11 C15 H15B 109.5 . . ?
 C11 C15 H15C 109.5 . . ?
 H15A C15 H15B 109.5 . . ?
 H15A C15 H15C 109.5 . . ?
 H15B C15 H15C 109.5 . . ?
 C1' O1' C11' 118.1(12) . . ?
 C6' O2' C3' 111.3(12) . . ?
 C9' O3' C10' 61.5(11) . . ?
 O1' C1' H1' 109.1 . . ?
 O1' C1' C2' 106.2(12) . . ?
 O1' C1' C12' 109.2(14) . . ?
 C2' C1' H1' 109.1 . . ?
 C12' C1' H1' 109.1 . . ?
 C12' C1' C2' 113.9(14) . . ?
 C1' C2' H2'1 109.8 . . ?
 C1' C2' H2'2 109.8 . . ?
 H2'1 C2' H2'2 108.2 . . ?
 C3' C2' C1' 109.5(13) . . ?
 C3' C2' H2'1 109.8 . . ?
 C3' C2' H2'2 109.8 . . ?
 O2' C3' H3' 107.9 . . ?
 O2' C3' C4' 101.4(11) . . ?
 C2' C3' O2' 110.6(13) . . ?
 C2' C3' H3' 107.9 . . ?
 C2' C3' C4' 120.5(14) . . ?
 C4' C3' H3' 107.9 . . ?
 Cl1' C4' H4' 110.6 . . ?
 C3' C4' Cl1' 112.1(12) . . ?
 C3' C4' H4' 110.6 . . ?
 C5' C4' Cl1' 109.9(12) . . ?
 C5' C4' C3' 102.7(14) . . ?
 C5' C4' H4' 110.6 . . ?
 C4' C5' H5'1 111.4 . . ?
 C4' C5' H5'2 111.4 . . ?
 C4' C5' C6' 102.1(14) . . ?
 H5'1 C5' H5'2 109.2 . . ?
 C6' C5' H5'1 111.4 . . ?
 C6' C5' H5'2 111.4 . . ?
 O2' C6' C5' 106.0(13) . . ?
 O2' C6' H6' 108.7 . . ?
 O2' C6' C7' 105.2(15) . . ?
 C5' C6' H6' 108.7 . . ?
 C7' C6' C5' 119.1(15) . . ?
 C7' C6' H6' 108.7 . . ?
 Br2' C7' H7' 108.0 . . ?
 C6' C7' Br2' 104.6(12) . . ?
 C6' C7' H7' 108.0 . . ?
 C8' C7' Br2' 109.7(12) . . ?
 C8' C7' C6' 118.1(14) . . ?
 C8' C7' H7' 108.0 . . ?
 C7' C8' H8'1 108.2 . . ?
 C7' C8' H8'2 108.2 . . ?
 H8'1 C8' H8'2 107.3 . . ?
 C9' C8' C7' 116.5(16) . . ?
 C9' C8' H8'1 108.2 . . ?
 C9' C8' H8'2 108.2 . . ?
 O3' C9' C8' 117.4(18) . . ?
 O3' C9' H9' 114.0 . . ?
 O3' C9' C10' 61.3(12) . . ?
 C8' C9' H9' 114.0 . . ?
 C8' C9' C10' 126(2) . . ?
 C10' C9' H9' 114.0 . . ?
 O3' C10' C9' 57.2(11) . . ?
 O3' C10' H10' 113.8 . . ?
 C9' C10' H10' 113.8 . . ?
 C11' C10' O3' 116.4(19) . . ?
 C11' C10' C9' 129(2) . . ?
 C11' C10' H10' 113.8 . . ?
 O1' C11' H11' 106.3 . . ?
 O1' C11' C15' 114.5(17) . . ?
 C10' C11' O1' 106.5(16) . . ?
 C10' C11' H11' 106.3 . . ?
 C10' C11' C15' 116.1(18) . . ?
 C15' C11' H11' 106.3 . . ?
 Br1' C12' H12' 108.2 . . ?
 C1' C12' Br1' 110.8(12) . . ?
 C1' C12' H12' 108.2 . . ?
 C13' C12' Br1' 109.6(13) . . ?
 C13' C12' C1' 111.6(15) . . ?
 C13' C12' H12' 108.2 . . ?
 C14' C13' C12' 176(2) . . ?
 C13' C14' H14' 180.0 . . ?
 C11' C15' H15D 109.5 . . ?
 C11' C15' H15E 109.5 . . ?
 C11' C15' H15F 109.5 . . ?
 H15D C15' H15E 109.5 . . ?
 H15D C15' H15F 109.5 . . ?
 H15E C15' H15F 109.5 . . ?

_audit_update_record
;
2014-03-08 deposited with the CCDC.
2015-12-11 downloaded from the CCDC.
;
_database_code_depnum_ccdc_archive 'CCDC 990739'
